# Supplementary material for: Neutrophils and Ly6Chi monocytes collaborate in generating an optimal cytokine response that protects against pulmonary Legionella pneumophila infection
Source: PubMed Central journal article supplement (PMC5404877; doi:10.1371/journal.ppat.1006309), 2017-04-06

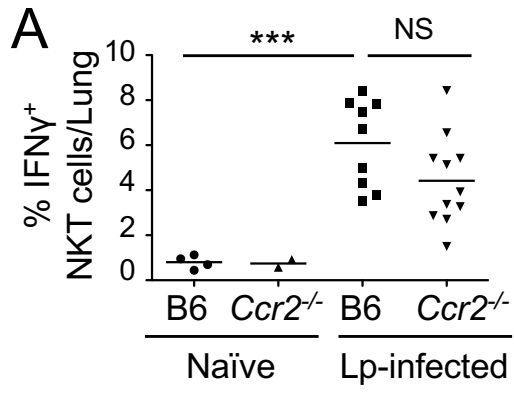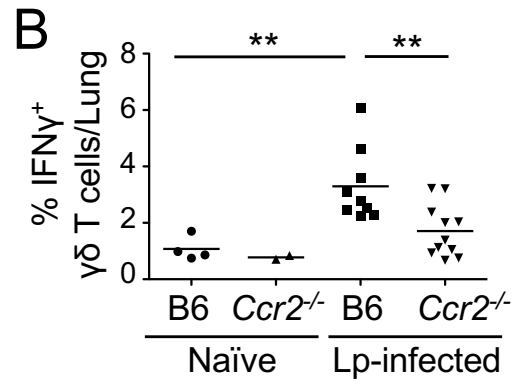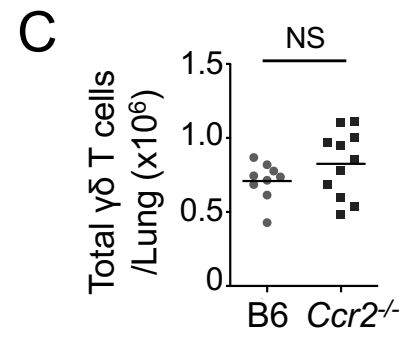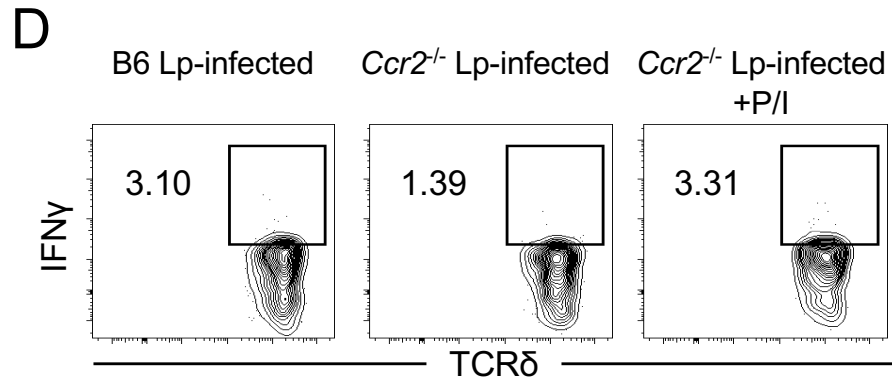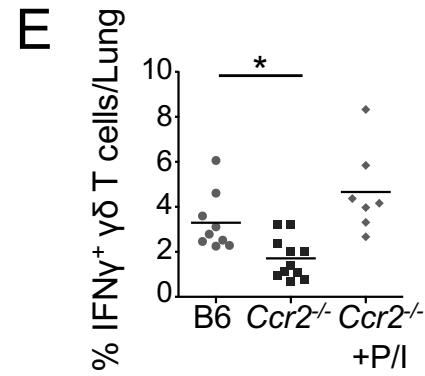

Supplement: ppat.1006309.s006.pdf [file ppat.1006309.s006.pdf]
